# Supplementary material
Source: PubMed Central journal article supplement (PMC3121222)
Supplement: supp_kwq478_kwq478_Web_Tables.pdf [file supp_kwq478_kwq478_Web_Tables.pdf]

**Web Table 1.** Population characteristics according to hours of daytime napping or nighttime sleeping

|                                         | Hours of daytime napping |             |             | Hours of nighttime sleeping |             |             |             |
|-----------------------------------------|--------------------------|-------------|-------------|-----------------------------|-------------|-------------|-------------|
|                                         | 0                        | <1          | ≥ 1         | <5                          | 5-6         | 7-8         | ≥ 9         |
| No. participants                        | 111, 801                 | 85, 622     | 17, 210     | 5, 345                      | 66, 442     | 136, 128    | 7, 143      |
| Age (years)                             | 61.8±5.3                 | 63.6±5.1    | 63.6±5.2    | 62.3±5.4                    | 62.3±5.4    | 62.8±5.3    | 63.5±5.1    |
| Male (%)                                | 52.1                     | 63.9        | 65.6        | 48.0                        | 56.0        | 59.2        | 57.2        |
| Race (%)                                |                          |             |             |                             |             |             |             |
| Caucasians                              | 94.1                     | 93.2        | 88.1        | 84.9                        | 90.2        | 94.9        | 95.2        |
| Others                                  | 5.1                      | 5.8         | 10.6        | 13.5                        | 8.6         | 4.2         | 3.9         |
| Missing                                 | 0.9                      | 1.0         | 1.3         | 1.7                         | 1.1         | 0.8         | 0.9         |
| Cigarette smoking (%)                   |                          |             |             |                             |             |             |             |
| Never smokers                           | 40.3                     | 37.8        | 31.6        | 39.4                        | 38.5        | 38.7        | 37.0        |
| Past smokers                            | 50.0                     | 52.1        | 52.1        | 46.0                        | 49.9        | 51.6        | 53.2        |
| Current smokers                         | 8.7                      | 8.9         | 14.8        | 12.7                        | 10.5        | 8.6         | 8.5         |
| Missing                                 | 1.0                      | 1.2         | 1.6         | 1.9                         | 1.2         | 1.1         | 1.3         |
| Daily caffeine intake (mg)              | 362.7±364.1              | 352.5±366.9 | 362.8±390.7 | 364.8±410.3                 | 369.0±382.2 | 354.5±358.8 | 332.7±352.9 |
| Physical activity (hours/week)          |                          |             |             |                             |             |             |             |
| Never or rare                           | 12.0                     | 12.6        | 20.6        | 19.5                        | 13.6        | 12.0        | 19.1        |
| ≤ 1                                     | 9.9                      | 10.2        | 11.0        | 10.1                        | 10.6        | 9.9         | 10.4        |
| 1-3                                     | 25.3                     | 25.3        | 24.0        | 23.1                        | 25.3        | 25.3        | 23.4        |
| 4-7                                     | 26.9                     | 26.5        | 22.8        | 20.7                        | 25.4        | 27.3        | 23.1        |
| >7                                      | 25.0                     | 24.3        | 20.1        | 24.5                        | 23.9        | 24.6        | 23.1        |
| Missing                                 | 0.9                      | 1.1         | 1.5         | 2.1                         | 1.2         | 0.9         | 0.9         |
| General health status (%)               |                          |             |             |                             |             |             |             |
| Excellent                               | 23.3                     | 16.4        | 10.7        | 11.1                        | 17.1        | 21.1        | 17.9        |
| Very good                               | 39.5                     | 37.2        | 29.0        | 26.6                        | 36.2        | 39.1        | 34.5        |
| Good                                    | 29.7                     | 35.4        | 39.6        | 37.0                        | 35.2        | 31.4        | 32.8        |
| Fair                                    | 5.8                      | 9.0         | 16.4        | 19.0                        | 9.3         | 6.6         | 11.7        |
| Poor                                    | 0.5                      | 0.9         | 2.9         | 4.5                         | 1.0         | 0.6         | 2.0         |
| Missing                                 | 1.1                      | 1.2         | 1.5         | 1.8                         | 1.3         | 1.2         | 1.2         |
| Depression                              |                          |             |             |                             |             |             |             |
| No                                      | 83.3                     | 81.4        | 75.7        | 73.6                        | 81.7        | 82.7        | 76.3        |
| Yes                                     | 8.6                      | 9.5         | 14.6        | 16.3                        | 9.8         | 8.8         | 14.6        |
| Missing                                 | 8.0                      | 9.1         | 9.7         | 10.1                        | 8.5         | 8.5         | 9.1         |
| Hours of daytime napping per day (%)    |                          |             |             |                             |             |             |             |
| 0                                       |                          |             |             | 42.9                        | 48.1        | 54.2        | 51.3        |
| <1                                      |                          |             |             | 39.0                        | 41.8        | 39.2        | 33.3        |
| ≥ 1                                     |                          |             |             | 17.8                        | 9.9         | 6.3         | 15.1        |
| Missing                                 |                          |             |             | 0.4                         | 0.3         | 0.3         | 0.4         |
| Hours of nighttime sleeping per day (%) |                          |             |             |                             |             |             |             |
| <5                                      | 2.1                      | 2.4         | 5.5         |                             |             |             |             |
| 5-6                                     | 28.6                     | 32.4        | 38.1        |                             |             |             |             |
| 7-8                                     | 66.0                     | 62.3        | 49.9        |                             |             |             |             |
| ≥ 9                                     | 3.3                      | 2.8         | 6.3         |                             |             |             |             |
| Missing                                 | 0.1                      | 0.1         | 0.3         |                             |             |             |             |

Means and standard deviation (Sd) are provided for continuous variables, and proportions for categorical variables. Gender, race, smoking, caffeine intake, and general health status were from the dietary survey (1995-1996); age, physical activity and napping/ sleeping duration were from the risk factor survey (1996-1997); depression was from the follow-up survey (2004-2006).

**Web Table 2.** Daytime napping in relation to Parkinson disease at different stages (Data for Figure 1)

|                                                                                    | Established   | Recent        | Prediagnostic |
|------------------------------------------------------------------------------------|---------------|---------------|---------------|
|                                                                                    | OR (95% CI)   | OR (95% CI)   | OR (95% CI)   |
| Adjusted for age, sex, race, physical activity, smoking status and caffeine intake |               |               |               |
| None (ref)                                                                         | 1.0           | 1.0           | 1.0           |
| < 1 hour                                                                           | 1.9 (1.4-2.6) | 1.1 (0.9-1.3) | 1.2 (1.0-1.3) |
| ≥ 1hour                                                                            | 3.9 (2.8-5.6) | 2.2 (1.7-3.0) | 1.5 (1.2-1.9) |
| <i>P</i> for trend                                                                 | < 0.0001      | < 0.0001      | 0.0003        |
| Further adjusted for health status                                                 |               |               |               |
| None (ref)                                                                         | 1.0           | 1.0           | 1.0           |
| < 1 hour                                                                           | 1.6 (1.2-2.1) | 1.0 (0.8-1.3) | 1.1 (1.0-1.3) |
| ≥ 1hour                                                                            | 2.4 (1.7-3.5) | 2.0 (1.5-2.7) | 1.4 (1.1-1.8) |
| <i>P</i> for trend                                                                 | < 0.0001      | < 0.0001      | 0.0022        |

OR: odds ratio; CI: confidence interval

**Web Table 3.** Nighttime sleeping in relation to Parkinson disease at different stages (Data for

Figure 2)

|                                                                                    | Established   | Recent        | Prediagnostic |
|------------------------------------------------------------------------------------|---------------|---------------|---------------|
|                                                                                    | OR (95% CI)   | OR (95% CI)   | OR (95% CI)   |
| Adjusted for age, sex, race, physical activity, smoking status and caffeine intake |               |               |               |
| < 5 hours                                                                          | 4.9 (3.0-7.9) | 0.9 (0.4-1.8) | 0.7 (0.4-1.3) |
| 5-6 hours                                                                          | 2.0 (1.5-2.6) | 0.7 (0.6-0.9) | 1.0 (0.9-1.2) |
| 7-8 hours (Ref)                                                                    | 1.0           | 1.0           | 1.0           |
| ≥ 9 hours                                                                          | 1.6 (0.9-3.0) | 1.5 (1.0-2.3) | 1.2 (0.8-1.7) |
| Further adjusted for health status                                                 |               |               |               |
| < 5 hours                                                                          | 2.9 (1.8-4.8) | 0.8 (0.4-1.6) | 0.7 (0.4-1.2) |
| 5-6 hours                                                                          | 1.7 (1.3-2.2) | 0.7 (0.6-0.9) | 1.0 (0.9-1.2) |
| 7-8 hours (Ref)                                                                    | 1.0           | 1.0           | 1.0           |
| ≥ 9 hours                                                                          | 1.3 (0.7-2.5) | 1.4 (0.9-2.2) | 1.1 (0.8-1.6) |

OR: odds ratio; CI: confidence interval
